# Supplementary material for: Risks and Benefits of Consumption of Great Lakes Fish
Source: PubMed Central journal article supplement (PMC3261933; doi:10.1289/ehp.1003396), 2011-09-23
Supplement: ehp.1003396.s001.pdf [file ehp.1003396.s001.pdf]

**Supplemental Materials:**  
**Risks and Benefits of Consumption of Great Lakes Fish**

Mary E. Turyk<sup>1</sup>, Satyendra P. Bhavsar<sup>2</sup>, William Bowerman<sup>3</sup>, Eric Boysen<sup>4</sup>, Milton Clark<sup>5</sup>, Miriam Diamond<sup>6</sup>, Donna Mergler<sup>7</sup>, Peter Pantazopoulos<sup>8</sup>, Susan Schantz<sup>9</sup>, and David O. Carpenter<sup>10</sup>

<sup>1</sup>Division of Epidemiology and Biostatistics, School of Public Health, University of Illinois at Chicago, Chicago, IL, USA

<sup>2</sup>Environmental Monitoring and Reporting Branch, Ontario Ministry of the Environment, Toronto, Ontario, Canada

<sup>3</sup>Department of Environmental Science and Technology, University of Maryland, College Park, MD, USA

<sup>4</sup>Great Lakes Branch, Ontario Ministry of Natural Resources, Peterborough, Ontario, Canada

<sup>5</sup>Division of Environmental and Occupational Health Sciences, School of Public Health, University of Illinois at Chicago, Chicago, IL, USA

<sup>6</sup>Department of Geography and Program in Planning and Department of Chemical Engineering and Applied Chemistry University of Toronto, Ontario, Canada

<sup>7</sup>Centre de Recherche Interdisciplinaire sur la Biologie, la Santé, la Société et l'Environnement (CINBIOSE), Université du Québec à Montreal, Canada

<sup>8</sup>Food Laboratories Division, Ontario Region, Health Canada, Toronto, Ontario, Canada

<sup>9</sup>Department of Veterinary Biosciences, University of Illinois at Urbana-Champaign, Urbana, IL, USA

<sup>10</sup>Institute for Health and the Environment, University at Albany, Rensselaer, NY, USA



Supplemental Material, Table 1: Comparison of Omega-3 Fatty Acids in Great Lakes and Marine Fish (continued)

| Location          | Sample  | Species                          | N | Total Fat<br>g/100 g<br>fish | Omega-3<br>g/100 g<br>lipid | Omega-3<br>mg/100 g<br>fish | EPA<br>g/100 g<br>lipid | EPA<br>mg/100<br>g fish | DHA<br>g/100 g<br>lipid | DHA<br>mg/100 g<br>fish | DHA+EPA<br>g/100 g<br>lipid | DHA+EPA<br>mg/100 g<br>fish | Author            |
|-------------------|---------|----------------------------------|---|------------------------------|-----------------------------|-----------------------------|-------------------------|-------------------------|-------------------------|-------------------------|-----------------------------|-----------------------------|-------------------|
| Southeastern      | Fillet  | Black Sea Bass                   | 2 | 0.7                          | NA                          | NA                          | 4.9                     | 27                      | 23.4                    | 121                     | 28                          | 148                         | Gooch et al. 1987 |
| U.S. <sup>c</sup> | skinned | Bluefish                         | 4 | 2.4                          | NA                          | NA                          | 4.7                     | 83                      | 21.1                    | 174                     | 26                          | 257                         |                   |
|                   |         | Channel Catfish                  | 3 | 2.4                          | NA                          | NA                          | 3.7                     | 76                      | 4.8                     | 94                      | 9                           | 170                         |                   |
|                   |         | Atlantic Croaker                 | 3 | 2.2                          | NA                          | NA                          | 4.5                     | 125                     | 6.4                     | 125                     | 11                          | 250                         |                   |
|                   |         | Dolphin                          | 3 | 0.8                          | NA                          | NA                          | 3.5                     | 22                      | 31.1                    | 196                     | 35                          | 218                         |                   |
|                   |         | Southern<br>Flounder             | 2 | 0.6                          | NA                          | NA                          | 3.6                     | 18                      | 21.7                    | 95                      | 25                          | 113                         |                   |
|                   |         | Goosefish<br>(Monkfish)          | 4 | 0.6                          | NA                          | NA                          | 7                       | 25                      | 24.4                    | 90                      | 31                          | 115                         |                   |
|                   |         | Gag Grouper                      | 3 | 2.2                          | NA                          | NA                          | 3.4                     | 65                      | 15.4                    | 276                     | 19                          | 341                         |                   |
|                   |         | Yellowedge<br>Grouper            | 3 | 1.0                          | NA                          | NA                          | 3.3                     | 36                      | 20.2                    | 209                     | 24                          | 245                         |                   |
|                   |         | White Grunt                      | 3 | 0.7                          | NA                          | NA                          | 5.9                     | 33                      | 18                      | 88                      | 24                          | 121                         |                   |
|                   |         | Speckled Hind                    | 4 | 4.4                          | NA                          | NA                          | 2.7                     | 87                      | 12.4                    | 403                     | 15                          | 490                         |                   |
|                   |         | Crevalle Jack                    | 4 | 3.9                          | NA                          | NA                          | 3.8                     | 113                     | 16.2                    | 258                     | 20                          | 371                         |                   |
|                   |         | Southern Kingfish                | 3 | 3.5                          | NA                          | NA                          | 2.8                     | 67                      | 5.4                     | 175                     | 8                           | 242                         |                   |
|                   |         | Ladyfish                         | 3 | 4.4                          | NA                          | NA                          | 2.5                     | 83                      | 7.5                     | 251                     | 10                          | 334                         |                   |
|                   |         | King Mackerel                    | 2 | 1.7                          | NA                          | NA                          | 5.2                     | 45                      | 10.9                    | 131                     | 16                          | 176                         |                   |
|                   |         | Striped Mullet                   | 5 | 5.1                          | NA                          | NA                          | 7.5                     | 355                     | 7.1                     | 136                     | 15                          | 491                         |                   |
|                   |         | Red Porgy                        | 2 | 1.0                          | NA                          | NA                          | 3.7                     | 21                      | 27.3                    | 193                     | 31                          | 214                         |                   |
|                   |         | American Shad                    | 4 | 14.6                         | NA                          | NA                          | 3.7                     | 506                     | 6.5                     | 887                     | 10                          | 1393                        |                   |
|                   |         | Atlantic<br>Sharpnose Shark      | 3 | 0.8                          | NA                          | NA                          | 2.2                     | 13                      | 18.5                    | 112                     | 21                          | 125                         |                   |
|                   |         | Lemon Shark                      | 2 | 0.6                          | NA                          | NA                          | 2.1                     | 6                       | 15.5                    | 49                      | 18                          | 55                          |                   |
|                   |         | Scalloped<br>Hammerhead<br>Shark | 2 | 0.6                          | NA                          | NA                          | 2                       | 11                      | 15.1                    | 75                      | 17                          | 86                          |                   |
|                   |         | Tiger Shark                      | 2 | 0.6                          | NA                          | NA                          | 1.6                     | 7                       | 11.3                    | 52                      | 13                          | 59                          |                   |
|                   |         | Sheepshead                       | 3 | 1.6                          | NA                          | NA                          | 3.9                     | 51                      | 6.4                     | 82                      | 10                          | 133                         |                   |
|                   |         | Red Snapper                      | 3 | 1.2                          | NA                          | NA                          | 3.4                     | 40                      | 18.7                    | 216                     | 22                          | 256                         |                   |

Supplemental Material, Table 1: Comparison of Omega-3 Fatty Acids in Great Lakes and Marine Fish (continued)

| Location                                                             | Sample            | Species                    | N | Total Fat<br>g/100 g<br>fish | Omega-3<br>g/100 g<br>lipid | Omega-3<br>mg/100 g<br>fish | EPA<br>g/100 g<br>lipid | EPA<br>mg/100<br>g fish | DHA<br>g/100 g<br>lipid | DHA<br>mg/100 g<br>fish | DHA+EPA<br>g/100 g<br>lipid | DHA+EPA<br>mg/100 g<br>fish | Author                 |
|----------------------------------------------------------------------|-------------------|----------------------------|---|------------------------------|-----------------------------|-----------------------------|-------------------------|-------------------------|-------------------------|-------------------------|-----------------------------|-----------------------------|------------------------|
|                                                                      |                   | Vermilion<br>Snapper       | 3 | 0.7                          | NA                          | NA                          | 3.2                     | 14                      | 26.3                    | 104                     | 30                          | 118                         |                        |
|                                                                      |                   | Tilefish                   | 2 | 1.0                          | NA                          | NA                          | 2.8                     | 22                      | 20.3                    | 147                     | 23                          | 169                         |                        |
|                                                                      |                   | Blueline Tilefish          | 3 | 3.2                          | NA                          | NA                          | 2.8                     | 60                      | 13.8                    | 284                     | 17                          | 344                         |                        |
|                                                                      |                   | Gray Triggerfish           | 4 | 0.7                          | NA                          | NA                          | 4.2                     | 24                      | 24.4                    | 155                     | 29                          | 179                         |                        |
|                                                                      |                   | Weakfish                   | 3 | 1.7                          | NA                          | NA                          | 3.8                     | 66                      | 13.2                    | 233                     | 17                          | 299                         |                        |
|                                                                      |                   | Mean                       |   | 2.2                          |                             |                             | 3.7                     | 72                      | 16.0                    | 187                     | 19.7                        | 259                         |                        |
|                                                                      |                   | Median                     |   | 1.2                          |                             |                             | 3.6                     | 40                      | 15.5                    | 147                     | 18.8                        | 214                         |                        |
|                                                                      |                   | Min                        |   | 0.6                          |                             |                             | 1.6                     | 6                       | 4.8                     | 49                      | 8.2                         | 55                          |                        |
|                                                                      |                   | Max                        |   | 14.6                         |                             |                             | 7.5                     | 506                     | 31.1                    | 887                     | 34.6                        | 1393                        |                        |
| Commercial Fish<br>Most Frequently<br>Consumed<br>in US <sup>d</sup> | Edible<br>portion | Salmon, Atlantic<br>farmed |   | 13.4                         | NA                          | NA                          | 6.4                     | 862                     | 8.2                     | 1104                    | 15                          | 1966                        | USDA 2010 <sup>b</sup> |
|                                                                      |                   | Salmon, Atlantic<br>wild   |   | 6.3                          | NA                          | NA                          | 5.1                     | 321                     | 17.6                    | 1115                    | 23                          | 1436                        |                        |
|                                                                      |                   | Tuna, bluefin              |   | 4.9                          | NA                          | NA                          | 5.8                     | 283                     | 18.2                    | 890                     | 24                          | 1173                        |                        |
|                                                                      |                   | Tuna, skipjack             |   | 1.0                          | NA                          | NA                          | 7.0                     | 71                      | 18.3                    | 185                     | 25                          | 256                         |                        |
|                                                                      |                   | Cod, Atlantic              |   | 0.7                          | NA                          | NA                          | 9.6                     | 64                      | 17.9                    | 120                     | 27                          | 184                         |                        |
|                                                                      |                   | Pollock, Atlantic          |   | 1.0                          | NA                          | NA                          | 7.2                     | 71                      | 35.7                    | 350                     | 43                          | 421                         |                        |
|                                                                      |                   | Tilapia                    |   | 1.7                          | NA                          | NA                          | 0.3                     | 5                       | 5.1                     | 86                      | 5                           | 91                          |                        |
|                                                                      |                   | Catfish farmed             |   | 5.9                          | NA                          | NA                          | 0.3                     | 17                      | 1.0                     | 57                      | 1                           | 74                          |                        |
|                                                                      |                   | Catfish wild               |   | 2.8                          | NA                          | NA                          | 4.6                     | 130                     | 8.3                     | 234                     | 13                          | 364                         |                        |
|                                                                      |                   | Tuna, canned               |   | 0.8                          | NA                          | NA                          | 5.7                     | 47                      | 27.2                    | 223                     | 33                          | 270                         |                        |
|                                                                      |                   | Crab, blue                 |   | 1.1                          | NA                          | NA                          | 15.7                    | 170                     | 13.9                    | 150                     | 30                          | 320                         |                        |
|                                                                      |                   | Shrimp                     |   | 1.0                          | NA                          | NA                          | 3.0                     | 30                      | 0.3                     | 3                       | 3                           | 33                          |                        |
|                                                                      |                   | Lobster                    |   | 0.8                          | NA                          | NA                          | 13.6                    | 102                     | 9.1                     | 68                      | 23                          | 170                         |                        |
|                                                                      |                   | Clams                      |   | 1.0                          | NA                          | NA                          | 4.5                     | 43                      | 6.7                     | 64                      | 11                          | 107                         |                        |
|                                                                      |                   | Mean                       |   | 2.2                          |                             |                             | 6.3                     | 104                     | 13.8                    | 273                     | 20.1                        | 377                         |                        |
|                                                                      |                   | Mean                       |   | 1.0                          |                             |                             | 5.8                     | 71                      | 11.5                    | 168                     | 22.7                        | 263                         |                        |
|                                                                      |                   | Min                        |   | 0.7                          |                             |                             | 0.3                     | 5                       | 0.3                     | 3                       | 1.2                         | 33                          |                        |
|                                                                      |                   | Max                        |   | 6.3                          |                             |                             | 15.7                    | 321                     | 35.7                    | 1115                    | 43.0                        | 1436                        |                        |

Supplemental Material, Table 1: Comparison of Omega-3 Fatty Acids in Great Lakes and Marine Fish (continued)

| Location     | Sample  | Species            | N    | Total Fat<br>g/100 g<br>fish | Omega-3<br>g/100 g<br>lipid | Omega-3<br>mg/100 g<br>fish | EPA<br>g/100 g<br>lipid | EPA<br>mg/100<br>g fish | DHA<br>g/100 g<br>lipid | DHA<br>mg/100 g<br>fish | DHA+EPA<br>g/100 g<br>lipid | DHA+EPA<br>mg/100 g<br>fish | Author                 |
|--------------|---------|--------------------|------|------------------------------|-----------------------------|-----------------------------|-------------------------|-------------------------|-------------------------|-------------------------|-----------------------------|-----------------------------|------------------------|
| Commercial   | Edible  | Herring, Atlantic  |      | 9.0                          | NA                          | NA                          | 7.9                     | 709                     | 9.6                     | 862                     | 17                          | 1571                        | USDA 2010 <sup>a</sup> |
| Fatty Marine | portion | Anchovy            |      | 4.8                          | NA                          | NA                          | 11.2                    | 538                     | 19.0                    | 911                     | 30                          | 1449                        |                        |
| Fish         |         | Mackerel, Atlantic |      | 13.9                         | NA                          | NA                          | 6.5                     | 898                     | 10.1                    | 1401                    | 17                          | 2299                        |                        |
|              |         | Salmon, Atlantic   |      | 6.3                          | NA                          | NA                          | 5.1                     | 321                     | 17.6                    | 1115                    | 23                          | 1436                        |                        |
|              |         | Tuna, bluefin      |      | 4.9                          | NA                          | NA                          | 5.8                     | 283                     | 18.2                    | 890                     | 24                          | 1173                        |                        |
|              |         | Mean               |      | 7.8                          |                             |                             | 7.3                     | 550                     | 14.9                    | 1036                    | 22.2                        | 1586                        |                        |
|              | Median  |                    | 6.3  |                              |                             | 6.5                         | 538                     | 17.6                    | 911                     | 22.6                    | 1449                        |                             |                        |
|              | Min     |                    | 4.8  |                              |                             | 5.1                         | 283                     | 9.6                     | 862                     | 16.5                    | 1173                        |                             |                        |
|              | Max     |                    | 13.9 |                              |                             | 11.2                        | 898                     | 19                      | 1401                    | 30.2                    | 2299                        |                             |                        |

DHA=docosahexaenoic acid

EPA= eicosapentaenoic acid

NA=not available

<sup>a</sup> Calculated from mean values given in publication or database:  $\text{omega-3 mg/100 g fish} = \text{omega-3 g/100 g total fat} \times \text{total fat g/100 g fish} \times 1000 \text{ mg omega-3/1 g omega-3} / 100$

<sup>b</sup> Calculated from mean values given in publication or database:  $\text{omega-3 g/100 g total fat} = \text{omega-3 mg/100 g fish} \times 1 \text{ g omega-3/1000 mg omega-3} / \text{total fat g/100 g fish} \times 100$

<sup>c</sup> Charleston, SC seafood market, North Carolina coast

<sup>d</sup> Types of fish frequently consumed in the US as identified by the National Health and Nutrition Examination Survey (NHANES) (Mahaffey et al. 2008) and the National Marine Fisheries Service (National Fisheries Institute Inc 2008).

## References

- Chan HM, Trifonopoulos M, Ing A, Receveur O, Johnson E. 1999. Consumption of freshwater fish in Kahnawake: risks and benefits. *Environ Res* 80:S213-S222.
- Gooch JA, Hale MB, Brown TJ, Bonnet JC, Brand CG, Regier LW. 1987. Proximate and fatty acid composition of 40 Southeastern U.S. finfish species. NOAA Technical Report NMFS 54:1-23.
- Karahadian C, Lindsay RC. 1989. Composition of n-3 oils from some Great Lakes freshwater fish. *J Food Composition Analysis* 2:13-21.
- Mahaffey KR, Clickner RP, Jeffries RA. 2008. Methylmercury and omega-3 fatty acids: co-occurrence of dietary sources with emphasis on fish and shellfish. *Environ Res* 107:20-29.
- National Fisheries Institute Inc. 2008. Top 10 Consumed Seafoods. <http://www.aboutseafood.com/about/about-seafood/Top-10-Consumed-Seafoods> [accessed 12/18/08].
- USDA. 2010. National Nutrient Database. <http://www.nal.usda.gov/fnic/foodcomp/search/> [accessed 8 November 2008].
- Wang YJ, Miller LA, Perren M, Addis PB. 1990. Omega-3 fatty acids in Lake Superior fish. *J Food Sci* 55:71-73.
